# Supplementary material
Source: publisher figshare collection journal article supplement (https://sage.figshare.com/ndownloader/files/21000306)
Supplement: Supplementary file 1 [file 21000306]

## Supplemental Materials for

### Evaluating a remote patient monitoring program for automated peritoneal dialysis

Juan G Ariza<sup>1</sup>, Surrey M Walton<sup>2</sup>, Mauricio Sanabria<sup>3</sup>, Alfonso Bunch<sup>3</sup>, Jasmin Vesga<sup>4</sup>, Angela Rivera<sup>5</sup>

<sup>1</sup> Baxter Latin America, Bogotá D.C. Colombia

<sup>2</sup> Second City Outcomes Research, LLC, Oak Park, IL, USA

<sup>3</sup> Baxter Renal Care Services (BRCS) Latin America. Bogotá D.C. Colombia

<sup>4</sup> Baxter Renal Care Services (BRCS) Colombia. Bogotá D.C. Colombia

<sup>5</sup> Baxter Healthcare Corporation, Deerfield, IL, USA

Supplemental Material File Listing

Hospitalization cost per day calculation

Summary of Results from the Underlying Data Related to the Hospital Cost Abstract

Corresponding author: Juan G Ariza-Transversal 23# 97-73, 6th Floor, Bogota D.C. Colombia, Mobile number: +573127185297, E-mail: juan\_ariza@baxter.com

#### Supplement 1. Hospitalization cost per day calculation

|                                                                                        |                  |
|----------------------------------------------------------------------------------------|------------------|
| <b>Episode Cost in Col Pesos</b>                                                       | <b>7,088,009</b> |
| <b>Hospitalization days per episode</b>                                                | <b>8.00</b>      |
| <b>Hospitalization costs per day in Colombian pesos</b>                                | <b>886,001</b>   |
| <b>Hospitalization day cost US\$<br/>(US\$ =2,956 Col\$, mean 2018 exchange rate)*</b> | <b>299.72</b>    |

\*Source cited in the paper, reference 15.

Summary of Results from the Underlying Data Related to the Hospital Cost Abstract

**Stata output hospitalization cost per episode (Colombian Pesos)**

```
. summarize Hospitalization_episode_cost, detail
```

Hospitalization cost per episode

---

|     | Percentiles | Smallest |             |          |
|-----|-------------|----------|-------------|----------|
| 1%  | 48486       | 22800    |             |          |
| 5%  | 136338      | 23031    |             |          |
| 10% | 381771      | 24292    | Obs         | 752      |
| 25% | 1382612     | 37447    | Sum of Wgt. | 752      |
| 50% | 3507080     |          | Mean        | 7088009  |
|     |             | Largest  | Std. Dev.   | 1.30e+07 |
| 75% | 7781386     | 7.77e+07 |             |          |
| 90% | 1.61e+07    | 1.28e+08 | Variance    | 1.69e+14 |
| 95% | 2.42e+07    | 1.49e+08 | Skewness    | 6.807684 |
| 99% | 5.46e+07    | 1.75e+08 | Kurtosis    | 70.24695 |

### Stata output hospitalization days per episode

```
. summarize Hospitalization_days, detail
```

#### Lenght of stay per episode

---

|     | Percentiles | Smallest |             |          |
|-----|-------------|----------|-------------|----------|
| 1%  | 1           | 1        |             |          |
| 5%  | 1           | 1        |             |          |
| 10% | 1           | 1        | Obs         | 752      |
| 25% | 2           | 1        | Sum of Wgt. | 752      |
| 50% | 5           |          | Mean        | 8.00266  |
|     |             | Largest  | Std. Dev.   | 8.969247 |
| 75% | 10          | 51       |             |          |
| 90% | 18          | 52       | Variance    | 80.4474  |
| 95% | 25          | 78       | Skewness    | 3.094181 |
| 99% | 46          | 82       | Kurtosis    | 17.81689 |
